# Supplementary material for: Nitrogen and potassium interactions optimized asynchronous spikelet filling and increased grain yield of japonica rice
Source: PeerJ. 2023 Jan 17;11:e14710. doi: 10.7717/peerj.14710 (PMC9854376; doi:10.7717/peerj.14710)
Supplement: Data S1 [file peerj-11-14710-s001.xlsx]

## Sheet: Climate data
Rainfall and temperature data during the rice growing season
2020			2021
Day after transplanting	Precipitation (mm)	Mean daily temperature (°C）	Day after transplanting	Precipitation (mm)	Mean daily temperature (°C）
		17.4			23.9
		16		5.7	16.6
		16.1			14
		18.2			15.3
		23			15.3
		24.2			16.7
	2	20.9		1.6	15.4
	4.9	17.4			17.9
	0.2	19.2			19
	1.8	18.9			21
		17.7		3	19.1
		19.8		48	16.7
		22.3		0.4	14.8
		25.7		4.8	15.7
		27.8		6.3	16.1
	0.2	24.7			18.3
	3.1	20			21.7
		19.9			23.8
		24.7			22.6
	0	23.5		11	20.7
	9.9	21.2			22.1
	0	20			25.3
		23.1			26.6
		26		12.7	23.1
		23.5		4.2	20.6
		24.4			23.4
	1.7	26.1		15.3	20.5
	10.3	25.6		9.6	19.2
	18.4	24.3		7.2	20.3
	0	23.4			18.8
	0	20.8			19.6
		20.5			20.9
		19.5			22.8
	0	21.6			23.2
		24.3			23.7
		26.4		5.1	19.9
	14.8	23.9			21.5
		24.4		7.2	22.9
		26.5		3.7	22.6
		25.3		2	22.1
		23.1			24.3
	51.1	21			25.2
	0	22.2		25.5	23.7
		21.7		2	21.3
		22.5		1.7	21.9
		25.6		22.5	23.6
		26.1		0.9	23.8
		26.4		24.4	21.1
		26.4		3.3	23
		25.9			23.6
		25.9			25.1
		26.1			27.5
		26.9			28.7
		26.9		1.1	26.9
		25.9		0.2	27.3
	2.7	22.3			27.6
	4.6	22.8			28.2
		24.9			27.5
		27.7			27.2
		28.8			27.1
		29.1			27.3
		28.8			27.9
	0	28.2			27.8
	3.2	23.8			27.4
	0.9	24.7			27.7
	0	26.1			27.8
		25			27.8
		27			27.8
	1	26.7			28.1
	0.4	25.9		50.6	23.5
	5	24.8		8	24.9
	0.2	25.1		3.3	25.2
		26.1		18.4	20.2
		25.5		0.8	20.8
		24.9			23.1
		26.2			24.1
	0	24.8			23.4
		25.3			24.1
	43.7	24.3			25.7
		26.4			25.8
	11.6	23		7.9	22.2
		25.1			20.3
		24.9		6.6	19.6
		26.2		1.2	19.4
	0.9	25		0.1	20.9
	9.1	25.2			22
	25.5	19.5		35.2	21.8
	0	18.4		0.3	21.2
		19.8			22.7
	0	21.1			24.5
		23.1		4.9	21.3
	68.6	20.3		29.7	20.7
		22.4		0.5	22
		24.4		5.9	25
	48.7	22.4		8.4	24.2
	0.2	21.3		3.9	21.8
		18.2		4.9	19.4
		22			21.1
		25.4			20.6
	3.5	23.8			18.8
		22.6			20.4
	54.6	17.3			21.6
	6.8	17.5			21.3
	30	19.5			22.9
		21.2		13.2	19.6
	1.6	20.3			22
	38.2	16.8			23.2
	26	15.9		1.4	20.5
	12.6	17.5		1.3	16.7
	10.1	19.2			18.9
		18.3		33.9	16.5
		19.1		0.1	17
		18.2			16.7
	0	19.7			16
	4.6	18.1		12	16.6
	0.6	15.3			17.5
		14.4			19.1
	2.6	14.2		7.7	16.8
		13.5			16.1
		13.9			18.4
	1.3	15.5			19.4
		15.9		16.2	15.8
		17.5		29	16.1
		17.2		8.4	13.3
		16.9		1.7	15
		17.8			14.9
		15.9		14.8	15.9
		11.3		0.1	19.7
		10.2
	0.3	10.2

## Sheet: Soil data
Soil data
	Sample1	Sample2	Sample3	AVE	STDEV
pH	7.12	7.27	7.26	7.21667	0.083865
soil organic matter	24.1071	24.0827	24.6588	24.2829	0.325766
alkali-hydrolyzable N	76.86	77.39	79	77.75	1.1145
Olsen-P	20.99	19.69	20.35	20.3433	0.650026
NH4OAc-K	78	86	90	84.6667	6.1101

## Sheet: Grain weight
Dynamic data of superior and inferioe grain weight
	2020																		2021
	Superior									Inferior									Superior									Inferior
	Day after transplanting			6						Day after transplanting			6						Day after transplanting			6						Day after transplanting			6
	Treatment	Sample1	Sample2	Sample3	AVE	STDEV				Treatment	Sample1	Sample2	Sample3	AVE	STDEV				Treatment	Sample1	Sample2	Sample3	AVE	STDEV				Treatment	Sample1	Sample2	Sample3	AVE	STDEV
	N0K0	3.30676	3.54196	3.74698	3.5319	0.220284				N0K0	2.7181	2.66146	2.63109	2.67022	0.044162				N0K0	3.07258	3.41667	2.96178	3.15034	0.237202				N0K0	2.55556	2.28477	2.39837	2.4129	0.135977
	N0K60	3.84074	3.81081	3.656	3.76918	0.0991559				N0K60	2.86374	2.77128	2.84	2.825	0.0480193				N0K60	3.11111	3.38136	3.09868	3.19705	0.159734				N0K60	2.61194	2.63688	2.46154	2.57012	0.094857
	N0K120	4.08255	3.82703	3.88239	3.93066	0.134426				N0K120	3.0589	2.96782	2.9929	3.00654	0.0470505				N0K120	3.59259	3.08148	3.53571	3.40326	0.280118				N0K120	2.7651	2.71039	2.66387	2.71312	0.0506727
	N90K0	4.01534	3.97908	4.26758	4.08733	0.157145				N90K0	2.82344	2.83176	2.78144	2.81221	0.0269696				N90K0	3.32073	3.12371	3.28944	3.24463	0.105879				N90K0	2.60861	2.65333	2.61545	2.6258	0.0240914
	N90K60	4.30417	4.38811	4.41718	4.36982	0.0586838				N90K60	2.93953	3.04115	2.90604	2.96224	0.0703579				N90K60	3.64012	3.52705	3.3743	3.51382	0.133402				N90K60	2.68387	2.70588	2.84962	2.74646	0.0900188
	N90K120	4.45838	4.39052	4.34123	4.39671	0.05882				N90K120	3.00076	2.93263	2.99262	2.97534	0.0372093				N90K120	3.61277	3.64	3.74118	3.66465	0.0676605				N90K120	2.83094	2.77778	2.81892	2.80921	0.0278793
	N180K0	4.32893	4.28939	4.2779	4.29874	0.0267686				N180K0	2.65911	2.69173	2.78528	2.71204	0.0654923				N180K0	3.53953	3.24331	3.7012	3.49468	0.232216				N180K0	2.27976	2.53354	2.5679	2.4604	0.157379
	N180K60	5.014	4.87547	4.84196	4.91048	0.0912054				N180K60	2.70796	2.82322	2.72128	2.75082	0.0630542				N180K60	3.69466	3.93116	3.7992	3.80834	0.118516				N180K60	2.4593	2.44068	2.59113	2.49704	0.0820192
	N180K120	5.02113	4.98438	4.97911	4.99487	0.02289				N180K120	2.79899	2.99333	2.8424	2.87824	0.102009				N180K120	3.92259	3.75203	4.1581	3.94424	0.203899				N180K120	2.62201	2.56789	2.6872	2.6257	0.0597425
	Day after transplanting			12						Day after transplanting			12						Day after transplanting			12						Day after transplanting			12
	Treatment	Sample1	Sample2	Sample3	AVE	STDEV				Treatment	Sample1	Sample2	Sample3	AVE	STDEV				Treatment	Sample1	Sample2	Sample3	AVE	STDEV				Treatment	Sample1	Sample2	Sample3	AVE	STDEV
	N0K0	7.89529	8.0069	7.83418	7.91212	0.0875814				N0K0	4.51709	4.38655	4.50728	4.47031	0.0727009				N0K0	5.15833	4.72642	4.99301	4.95925	0.217929				N0K0	2.64928	2.8604	2.59804	2.70257	0.139065
	N0K60	8.20645	8.04393	8.04061	8.097	0.0948038				N0K60	4.36667	4.65769	4.54749	4.52395	0.146934				N0K60	5.44733	5.70714	5.28394	5.47947	0.213424				N0K60	2.95575	3.01724	2.75	2.90766	0.13996
	N0K120	8.45103	8.49365	8.45455	8.46641	0.0236562				N0K120	4.86	4.58824	4.62481	4.69101	0.147484				N0K120	5.71094	5.5298	5.52688	5.58921	0.105432				N0K120	3.12987	2.91209	3.34532	3.12909	0.216619
	N90K0	10.0175	10.2036	10.3462	10.1891	0.164833				N90K0	4.56178	4.55545	4.6494	4.58888	0.0525094				N90K0	5.74011	5.85872	6.02577	5.87487	0.143513				N90K0	2.71053	3.24444	3.24444	3.06647	0.308258
	N90K60	10.3789	10.4742	10.2529	10.3686	0.111003				N90K60	4.75905	4.58411	4.51212	4.61842	0.12699				N90K60	5.68966	6.2783	6.125	6.03099	0.305377				N90K60	3.16364	3.06608	3.37257	3.20076	0.156579
	N90K120	10.4493	10.5611	10.6798	10.5634	0.115267				N90K120	4.99429	4.604	4.65091	4.74973	0.213085				N90K120	6.16566	6.04184	6.04167	6.08305	0.0715353				N90K120	3.45641	3.41004	3.152	3.33948	0.164012
	N180K0	10.5812	10.8407	10.7605	10.7275	0.132894				N180K0	4.171	3.97745	4.04602	4.06482	0.0981345				N180K0	5.63178	5.83178	6.31718	5.92692	0.352463				N180K0	3.06875	2.9703	3.39375	3.14427	0.221597
	N180K60	11.1755	10.9992	11.0552	11.0766	0.0900534				N180K60	4.049	4.35685	4.18418	4.19668	0.154308				N180K60	6.52788	6.37736	6.37131	6.42552	0.0887025				N180K60	3.22234	3.64836	3.21092	3.36054	0.249325
	N180K120	11.5269	11.5869	11.4844	11.5328	0.0515051				N180K120	4.44043	4.07024	4.35938	4.29001	0.194594				N180K120	6.67717	6.28772	6.607	6.52396	0.207579				N180K120	3.24424	3.72687	3.59091	3.52067	0.248864
	Day after transplanting			18						Day after transplanting			18						Day after transplanting			18						Day after transplanting			18
	Treatment	Sample1	Sample2	Sample3	AVE	STDEV				Treatment	Sample1	Sample2	Sample3	AVE	STDEV				Treatment	Sample1	Sample2	Sample3	AVE	STDEV				Treatment	Sample1	Sample2	Sample3	AVE	STDEV
	N0K0	12.8493	13.0097	13.2969	13.052	0.226784				N0K0	5.83667	5.45439	5.39565	5.56223	0.239472				N0K0	10.5888	10.0214	10.3355	10.3152	0.284221				N0K0	5.19192	5.11029	5.38889	5.23037	0.143222
	N0K60	13.2928	13.3388	13.4215	13.351	0.0652079				N0K60	6.00354	6.1375	6.07469	6.07191	0.0670234				N0K60	10.8197	12.0121	11.4724	11.4348	0.597119				N0K60	5.44444	5.79808	6.05618	5.76623	0.307108
	N0K120	13.5719	13.3667	13.6225	13.5204	0.135494				N0K120	5.92481	6.33226	6.30347	6.18684	0.227388				N0K120	11.7627	11.9346	12.5102	12.0692	0.391506				N0K120	5.54839	5.92105	5.95495	5.80813	0.225583
	N90K0	16.3394	16.5843	16.331	16.4182	0.143867				N90K0	8.03468	8.2621	7.72609	8.00762	0.269027				N90K0	10.988	11.0167	10.5699	10.8582	0.250068				N90K0	5.25128	4.94771	5.71538	5.30479	0.386623
	N90K60	16.9091	17.0596	16.8732	16.9473	0.0988957				N90K60	8.52203	9.02569	9.10662	8.88478	0.316743				N90K60	11.3281	11.4953	12.3772	11.7336	0.563677				N90K60	5.69369	5.91351	5.7482	5.78514	0.11447
	N90K120	17.2711	17.4044	17.3511	17.3422	0.0670751				N90K120	8.61197	9.32727	9.1125	9.01725	0.367044				N90K120	12.2181	12.0887	11.63	11.9789	0.309023				N90K120	6.10526	5.70543	5.66452	5.82507	0.243516
	N180K0	15.642	15.5119	15.6149	15.5896	0.0686479				N180K0	6.02176	5.41751	5.74156	5.72694	0.302388				N180K0	10.5409	11.4802	11.6132	11.2114	0.584486				N180K0	5.40884	5.60897	5.66452	5.56078	0.13448
	N180K60	16.3244	16.2635	16.5231	16.3703	0.135758				N180K60	6.05586	5.73665	6.03278	5.94176	0.178009				N180K60	11.8824	11.7119	12.3233	11.9725	0.315516				N180K60	5.80738	6.27273	6.15254	6.07755	0.241569
	N180K120	16.5569	16.6782	16.3213	16.5188	0.181467				N180K120	6.04	6.43213	6.38889	6.28701	0.215004				N180K120	12.2053	13.1299	12.4593	12.5982	0.477681				N180K120	6.46522	6.69231	5.82833	6.32862	0.447896
	Day after transplanting			24						Day after transplanting			24						Day after transplanting			24						Day after transplanting			24
	Treatment	Sample1	Sample2	Sample3	AVE	STDEV				Treatment	Sample1	Sample2	Sample3	AVE	STDEV				Treatment	Sample1	Sample2	Sample3	AVE	STDEV				Treatment	Sample1	Sample2	Sample3	AVE	STDEV
	N0K0	17.772	17.6248	18.0981	17.8316	0.242225				N0K0	11.0678	10.3322	10.8051	10.735	0.372798				N0K0	13.3697	13.7784	13.8102	13.6528	0.245626				N0K0	5.88073	6.52857	6.69149	6.36693	0.428867
	N0K60	18.4867	18.2461	18.3763	18.3697	0.120451				N0K60	11.4525	11.0214	10.5371	11.0036	0.457976				N0K60	14.98	13.9077	14.614	14.5006	0.545085				N0K60	7.62963	7.6963	6.97143	7.43245	0.400647
	N0K120	18.316	18.3679	19.0114	18.5651	0.387402				N0K120	11.4591	11.1414	11.2289	11.2765	0.164109				N0K120	14.2431	14.5172	15.3807	14.7137	0.593694				N0K120	7.8254	8.20896	7.65823	7.89753	0.28236
	N90K0	19.6304	19.3704	19.7818	19.5942	0.208064				N90K0	11.5863	11.1199	11.5455	11.4172	0.258305				N90K0	16.4856	16.2129	15.6096	16.1027	0.448282				N90K0	8.1164	8.03704	8.21538	8.12294	0.0893534
	N90K60	19.9639	20.1041	19.9008	19.9896	0.104032				N90K60	11.4424	11.8814	11.9639	11.7626	0.280316				N90K60	16.9108	16.6763	16.9	16.829	0.132365				N90K60	8.69182	8.89773	9.125	8.90485	0.216676
	N90K120	19.72	20.1834	20.2764	20.0599	0.298045				N90K120	12.1811	11.4618	12.0957	11.9129	0.392927				N90K120	17.3291	16.9638	16.568	16.9536	0.380608				N90K120	9.37762	8.7483	9.16667	9.09753	0.320307
	N180K0	18.9936	19.5698	19.7672	19.4435	0.401956				N180K0	9.48435	9.93216	9.03021	9.48224	0.450976				N180K0	16.1287	16.5721	15.8846	16.1951	0.348495				N180K0	8.88718	8.9064	8.06818	8.62059	0.478495
	N180K60	20.0832	19.9967	19.4603	19.8467	0.337465				N180K60	9.75714	10.1747	9.55396	9.82859	0.316467				N180K60	17.3208	16.9569	17.1589	17.1455	0.182329				N180K60	9.18304	8.85915	9.2931	9.11176	0.225583
	N180K120	19.9606	19.7343	20.1564	19.9504	0.211229				N180K120	9.95792	9.89189	10.0621	9.97064	0.0858169				N180K120	17.7734	17.4734	17.541	17.5959	0.157362				N180K120	9.51883	9.53282	9.46183	9.50449	0.0376018
	Day after transplanting			30						Day after transplanting			30						Day after transplanting			30						Day after transplanting			30
	Treatment	Sample1	Sample2	Sample3	AVE	STDEV				Treatment	Sample1	Sample2	Sample3	AVE	STDEV				Treatment	Sample1	Sample2	Sample3	AVE	STDEV				Treatment	Sample1	Sample2	Sample3	AVE	STDEV
	N0K0	19.0013	19.1788	19.0276	19.0692	0.0958111				N0K0	13.909	14.0162	14.0598	13.995	0.0776281				N0K0	18.4196	18.566	18.136	18.3739	0.218632				N0K0	10.0444	10.0522	9.56122	9.88595	0.281245
	N0K60	19.1298	19.3821	19.2604	19.2574	0.12616				N0K60	14.1701	14.0682	14.7578	14.332	0.372261				N0K60	19.1448	18.7267	18.9925	18.9547	0.211636				N0K60	9.92929	10.1258	9.83333	9.96282	0.149101
	N0K120	19.5812	19.4136	19.6848	19.5599	0.136844				N0K120	14.2575	14.2892	15.0785	14.5417	0.465135				N0K120	19.1235	18.8963	19.5379	19.1859	0.325314				N0K120	10.2843	10.9861	10.3494	10.5399	0.387763
	N90K0	20.6679	20.2847	20.5547	20.5024	0.196832				N90K0	16.3744	16.0731	15.9974	16.1483	0.199401				N90K0	18.2115	18.2935	18.8073	18.4374	0.322931				N90K0	10.2308	10.3403	10.3158	10.2956	0.0574959
	N90K60	20.6396	20.7604	20.8582	20.7527	0.109484				N90K60	16.356	16.3007	15.9826	16.2131	0.20152				N90K60	18.8073	19.1741	19.0721	19.0178	0.189332				N90K60	10.3158	9.97143	10.9174	10.4015	0.478756
	N90K120	21.2482	21.1492	21.3383	21.2452	0.0945989				N90K120	16.6422	16.117	16.4452	16.4015	0.265307				N90K120	19.0506	19.0239	19.7018	19.2588	0.383934				N90K120	10.8041	10.8117	10.619	10.7449	0.109084
	N180K0	20.685	20.4461	20.2217	20.4509	0.231703				N180K0	13.3827	13.336	13.8681	13.529	0.294621				N180K0	18.4483	18.6471	18.588	18.5611	0.102083				N180K0	10.2463	10.8988	10.9308	10.692	0.386295
	N180K60	20.7203	20.64	20.6865	20.6823	0.0403023				N180K60	13.403	14.14	13.6829	13.742	0.37204				N180K60	19.127	19.4416	19.6235	19.3974	0.251175				N180K60	10.8671	11.1883	10.6491	10.9015	0.271223
	N180K120	20.6187	20.7694	20.7546	20.7142	0.083032				N180K120	14.6091	14.4593	14.0653	14.3779	0.280934				N180K120	19.7253	19.3295	19.615	19.5566	0.204241				N180K120	11.1612	11.5362	10.624	11.1071	0.458464
	Day after transplanting			36						Day after transplanting			36						Day after transplanting			36						Day after transplanting			36
	Treatment	Sample1	Sample2	Sample3	AVE	STDEV				Treatment	Sample1	Sample2	Sample3	AVE	STDEV				Treatment	Sample1	Sample2	Sample3	AVE	STDEV				Treatment	Sample1	Sample2	Sample3	AVE	STDEV
	N0K0	20.1331	20.1026	20.1597	20.1318	0.0285775				N0K0	16.463	16.7217	15.462	16.2156	0.665326				N0K0	18.6918	17.9914	18.8829	18.522	0.469388				N0K0	12.2667	12.3381	12.8021	12.469	0.290698
	N0K60	20.581	20.2694	20.1711	20.3405	0.213995				N0K60	16.8283	15.8537	16.6911	16.4577	0.52757				N0K60	18.9804	19.6474	19.1159	19.2479	0.352525				N0K60	12.9431	12.875	13.0575	12.9585	0.0922091
	N0K120	20.4554	20.3333	20.5443	20.4443	0.105911				N0K120	16.8658	17.2013	17.8963	17.3212	0.525599				N0K120	19.8062	19.9545	18.7463	19.5024	0.658975				N0K120	13.2812	12.9603	13.0286	13.09	0.169067
	N90K0	20.6765	20.5703	20.8278	20.6915	0.129432				N90K0	18.1747	17.3569	18.1521	17.8946	0.465799				N90K0	18.9588	19.5856	19.0952	19.2132	0.329639				N90K0	12.5542	13.0684	12.5159	12.7128	0.308515
	N90K60	21.038	20.867	20.9223	20.9425	0.0872636				N90K60	18.4514	18.5246	18.2692	18.415	0.131524				N90K60	19.1471	19.8324	19.8712	19.6169	0.407326				N90K60	13.0231	13.0485	13.0714	13.0477	0.0241873
	N90K120	21.1246	21.5065	21.1077	21.2463	0.22553				N90K120	18.5423	18.8418	18.6634	18.6825	0.150663				N90K120	19.7078	19.6947	20.043	19.8152	0.197423				N90K120	14.0889	13.6966	13.789	13.8582	0.205076
	N180K0	20.6814	21.0853	20.638	20.8016	0.246675				N180K0	15.3683	14.3727	13.8433	14.5281	0.7743				N180K0	19.536	19.504	20.0388	19.693	0.299957				N180K0	12.8732	13.2817	12.6932	12.9493	0.301559
	N180K60	21.1099	21.3824	21.3805	21.2909	0.156778				N180K60	15.7155	16.2168	15.6203	15.8509	0.320495				N180K60	20.3955	19.4661	20.191	20.0175	0.488406				N180K60	12.7657	13.3876	13.6731	13.2755	0.463954
	N180K120	21.4396	21.6751	21.2122	21.4423	0.231442				N180K120	15.626	16.8033	16.0314	16.1535	0.598096				N180K120	20.4541	20.2778	20.5482	20.4267	0.137304				N180K120	14.0535	14.0826	13.6212	13.9191	0.258401
	Day after transplanting			42						Day after transplanting			42						Day after transplanting			42						Day after transplanting			42
	Treatment	Sample1	Sample2	Sample3	AVE	STDEV				Treatment	Sample1	Sample2	Sample3	AVE	STDEV				Treatment	Sample1	Sample2	Sample3	AVE	STDEV				Treatment	Sample1	Sample2	Sample3	AVE	STDEV
	N0K0	20.1233	20.4952	20.0046	20.2077	0.255949				N0K0	16.7648	16.2299	16.9741	16.6562	0.38378				N0K0	19.8222	20.2632	19.8992	19.9948	0.235527				N0K0	14.3111	14.5639	13.6296	14.1682	0.483253
	N0K60	20.4157	20.2848	20.4675	20.3893	0.0941195				N0K60	16.9278	16.891	17.0187	16.9458	0.0657042				N0K60	20.0767	20.0761	20.5366	20.2298	0.265683				N0K60	15.2735	14.4857	14.7705	14.8432	0.398901
	N0K120	20.4917	20.8862	20.2923	20.5567	0.302243				N0K120	17.5321	17.2893	17.6911	17.5042	0.202383				N0K120	20.5083	20.5614	20.8015	20.6238	0.156225				N0K120	15.0947	15	15.1163	15.0703	0.06186
	N90K0	20.9242	20.754	20.9005	20.8596	0.0921751				N90K0	18.5571	18.1361	18.0286	18.2406	0.279359				N90K0	19.9803	20.3636	20.7006	20.3482	0.360436				N90K0	15.5742	15.5389	14.6405	15.2512	0.529158
	N90K60	20.8699	21.2255	20.8948	20.9968	0.19851				N90K60	18.1819	19.2151	19.116	18.8377	0.570087				N90K60	20.7143	20.4439	20.3625	20.5069	0.184163				N90K60	15.1414	15.4688	15.5333	15.3812	0.210127
	N90K120	21.3246	21.3687	21.662	21.4518	0.183422				N90K120	19.3694	18.9959	19.1366	19.1673	0.188618				N90K120	20.9868	20.665	21.0179	20.8899	0.195385				N90K120	16.1921	16.4104	16.3525	16.3183	0.113111
	N180K0	21.2135	21.1206	21.0944	21.1429	0.0625725				N180K0	16.5266	16.397	16.4869	16.4702	0.0663957				N180K0	20.6895	20.3333	20.3791	20.4673	0.193765				N180K0	15.5097	15.1778	15.7725	15.4867	0.298024
	N180K60	20.978	21.735	21.3729	21.362	0.378618				N180K60	16.2052	16.4333	17.7336	16.7907	0.824513				N180K60	20.7631	21.097	20.8432	20.9011	0.174355				N180K60	15.5896	15.3523	16.2461	15.7293	0.46296
	N180K120	21.5876	21.4244	21.703	21.5716	0.139968				N180K120	17.7551	18.0168	16.9841	17.5853	0.536852				N180K120	21.1838	21.4598	20.7163	21.1199	0.375832				N180K120	16.6067	16.9574	16.359	16.641	0.300711
	Day after transplanting			48						Day after transplanting			48						Day after transplanting			48						Day after transplanting			48
	Treatment	Sample1	Sample2	Sample3	AVE	STDEV				Treatment	Sample1	Sample2	Sample3	AVE	STDEV				Treatment	Sample1	Sample2	Sample3	AVE	STDEV				Treatment	Sample1	Sample2	Sample3	AVE	STDEV
	N0K0	20.8022	20.5816	19.9825	20.4555	0.424146				N0K0	17.1971	17.4722	16.7333	17.1342	0.373412				N0K0	20.5357	20.0071	20.0161	20.1863	0.30261				N0K0	15.3495	15.8389	15.5667	15.585	0.245203
	N0K60	20.643	20.3486	20.6197	20.5371	0.163711				N0K60	17.8548	17.2314	18.076	17.7207	0.437962				N0K60	20.6698	20.4673	20.4571	20.5314	0.119962				N0K60	15.5843	16.28	15.8409	15.9017	0.35183
	N0K120	20.8756	20.5584	20.6259	20.6866	0.167089				N0K120	17.5303	18.5543	18.2658	18.1168	0.527986				N0K120	21	20.1619	21.0647	20.7422	0.503594				N0K120	15.7609	16.1111	16.5063	16.1261	0.372956
	N90K0	20.4445	21.0872	20.5646	20.6988	0.341691				N90K0	18.22	19.0162	19.0094	18.7485	0.457749				N90K0	20.9591	20.1916	20.3974	20.516	0.397233				N90K0	16.0252	16.5489	16.029	16.201	0.301268
	N90K60	20.9647	21.0858	21.0036	21.018	0.0617896				N90K60	18.6893	19.4378	19.7601	19.2957	0.549384				N90K60	20.2291	20.4688	21.1714	20.6231	0.489777				N90K60	16.5702	16.994	16.8217	16.7953	0.213129
	N90K120	20.9368	21.5269	20.966	21.1432	0.332543				N90K120	19.8082	19.7809	18.9108	19.5	0.510397				N90K120	20.9163	20.7797	21.3412	21.0124	0.292835				N90K120	16.9017	17.7407	17.4667	17.3697	0.427823
	N180K0	21.0383	20.8831	21.0158	20.9791	0.0838491				N180K0	18.0179	17.2052	17.4624	17.5618	0.415373				N180K0	20.7362	20.7553	20.8558	20.7824	0.0642497				N180K0	17.4232	16.614	17.1985	17.0786	0.417711
	N180K60	21.7252	20.8923	22.0235	21.547	0.586308				N180K60	17.8633	17.9685	18.0189	17.9503	0.0793871				N180K60	21.5945	21.0338	20.9378	21.1887	0.354682				N180K60	17.1887	17.3285	16.9772	17.1648	0.176869
	N180K120	21.3968	21.9631	22.0718	21.8106	0.36241				N180K120	18.4273	17.8522	18.0492	18.1096	0.292271				N180K120	21.4406	21.654	21.0995	21.398	0.279681				N180K120	17.692	18.01	17.7773	17.8264	0.164575

## Sheet: Figure 2 supplementary data
	Different lowercase letters after the data indicate the significant differences between the superior and inferior at the same treatment level (P < 0.05).
	2020					2021
		Superior final weight	Inferior final weight				Superior final weight	Inferior final weight
	N0K0	20.46a	17.13b			N0K0	20.19a	15.59b
	N0K60	20.54a	17.72b			N0K60	20.53a	15.90b
	N0K120	20.69a	18.12b			N0K120	20.74a	16.13b
	N90K0	20.70a	18.75b			N90K0	20.52a	16.20b
	N90K60	21.02a	19.30b			N90K60	20.62a	16.80b
	N90K120	21.14a	19.50b			N90K120	21.01a	17.37b
	N180K0	20.98a	17.56b			N180K0	20.78a	17.08b
	N180K60	21.55a	17.95b			N180K60	21.19a	17.16b
	N180K120	21.81a	18.11b			N180K120	21.40a	17.83b

## Sheet: Grain filling rate
	Grain filling rate was analyzed by software using average grain weight
2020
Day after transplanting	Superior										Inferior
	N0K0	N0K60	N0K120	N90K0	N90K60	N90K120	N180K0	N180K60	N180K120		N0K0	N0K60	N0K120	N90K0	N90K60	N90K120	N180K0	N180K60	N180K120
0	0.20193	0.20767	0.21912	0.23203	0.23899	0.24148	0.26582	0.28936	0.30176	--	0.10904	0.11802	0.12178	0.1292	0.14163	0.14436	0.11532	0.11541	0.11868
6	0.5238	0.54608	0.56614	0.74415	0.77589	0.792	0.73334	0.7835	0.80732	--	0.22867	0.24165	0.24805	0.27416	0.29193	0.2967	0.21621	0.22262	0.23107
12	0.93648	0.97072	0.98162	1.26242	1.29702	1.32518	1.15601	1.18124	1.1882	--	0.41836	0.43129	0.44128	0.49826	0.51485	0.52182	0.36367	0.38335	0.40016
18	0.89659	0.89982	0.89028	0.8001	0.78877	0.79563	0.80022	0.77816	0.76439	--	0.60016	0.60617	0.62068	0.68906	0.69509	0.70313	0.51124	0.54501	0.56806
24	0.47036	0.45316	0.44498	0.25757	0.24469	0.24306	0.30176	0.28642	0.27811	--	0.61265	0.61361	0.63203	0.65908	0.65936	0.66684	0.56095	0.59311	0.61155
30	0.17599	0.164	0.16151	0.06496	0.06007	0.0589	0.08924	0.08339	0.08067	--	0.44214	0.4457	0.46339	0.44247	0.44687	0.45262	0.46969	0.48336	0.48953
36	0.05764	0.05233	0.05188	0.01536	0.01389	0.01346	0.02434	0.02261	0.02185	--	0.24698	0.25304	0.26567	0.23264	0.23969	0.24335	0.31285	0.31025	0.30807
42	0.01805	0.01602	0.01601	0.00358	0.00317	0.00303	0.0065	0.00601	0.00581	--	0.11909	0.12444	0.13179	0.10716	0.11302	0.11504	0.17842	0.17029	0.16608
48	0.00557	0.00485	0.00488	0.000829946	0.000719374	0.00068214	0.00173	0.00159	0.00154	--	0.05342	0.05695	0.06077	0.0464	0.0501	0.05113	0.09299	0.08565	0.08224
2021
Day after transplanting	Superior										Inferior
	N0K0	N0K60	N0K120	N90K0	N90K60	N90K120	N180K0	N180K60	N180K120		N0K0	N0K60	N0K120	N90K0	N90K60	N90K120	N180K0	N180K60	N180K120
0	0.15169	0.16414	0.17372	0.16186	0.16601	0.17265	0.17031	0.1823	0.18686	--	0.09152	0.10295	0.10853	0.1046	0.11447	0.11511	0.10872	0.11657	0.12134
6	0.34333	0.38181	0.40103	0.39365	0.42473	0.43273	0.40551	0.44533	0.46591	--	0.15565	0.17255	0.18272	0.17587	0.18834	0.19259	0.18183	0.19495	0.20183
12	0.6339	0.70454	0.72789	0.7438	0.81614	0.81841	0.75041	0.82072	0.86123	--	0.24752	0.26893	0.28441	0.27473	0.28754	0.2989	0.28285	0.30109	0.31075
18	0.81844	0.86271	0.8706	0.89341	0.93417	0.93597	0.89078	0.92478	0.94441	--	0.35413	0.3747	0.39225	0.38304	0.392	0.41336	0.39357	0.41181	0.4253
24	0.67323	0.64612	0.63819	0.62978	0.59688	0.60782	0.63047	0.60329	0.58798	--	0.43625	0.44729	0.4587	0.45654	0.45868	0.4882	0.46969	0.47781	0.49627
30	0.37952	0.33122	0.32309	0.30061	0.25781	0.26854	0.30537	0.27104	0.25266	--	0.44766	0.44459	0.44288	0.45199	0.44935	0.47916	0.4673	0.45864	0.48133
36	0.1714	0.13856	0.13446	0.11799	0.09315	0.09916	0.12198	0.1021	0.0918	--	0.38089	0.36834	0.35527	0.37236	0.36983	0.39211	0.38793	0.36686	0.3901
42	0.06982	0.0531	0.05146	0.04279	0.03149	0.0342	0.04501	0.03592	0.03133	--	0.27604	0.26213	0.2453	0.26334	0.26344	0.27618	0.2768	0.25329	0.27301
48	0.02725	0.01967	0.01906	0.01508	0.01041	0.01152	0.01613	0.01234	0.01046	--	0.17786	0.16722	0.15252	0.16699	0.16913	0.17482	0.17707	0.1578	0.17222

## Sheet: Correlation analysis
Two-year data average	S-Gm	S-Ga	S-D	S-Tm	S-W	G	I-W	I-Tm	I-D	I-Ga	I-Gm
N0K0	0.909219	0.797191	14.8527	16.515	20.3209	20.5567	16.3596	24.5753	21.9258	0.477226	0.544289
N0K60	0.945654	0.829137	14.3767	16.2656	20.5343	20.6532	16.8112	24.0084	22.2232	0.47961	0.547009
N0K120	0.951089	0.833902	14.428	15.6576	20.7144	20.8297	17.1214	23.6174	22.0622	0.48998	0.558836
N90K0	1.08175	0.948466	12.8662	14.6325	20.6074	20.606	17.4748	23.4946	21.6939	0.514882	0.587237
N90K60	1.12695	0.988093	12.3952	14.1944	20.8206	21.0416	18.0455	23.2265	22.2388	0.51578	0.588261
N90K120	1.1411	1.0005	12.4728	14.1925	21.0778	21.1442	18.4348	23.2665	21.9838	0.532779	0.607649
N180K0	1.02792	0.901264	13.526	14.6455	20.8807	20.867	17.3202	24.9382	23.4783	0.457067	0.521298
N180K60	1.06449	0.933331	13.2406	14.1165	21.3678	21.1325	17.5575	24.2263	22.9149	0.472907	0.539363
N180K120	1.08413	0.950548	13.0692	13.8578	21.6043	21.3315	17.968	24.2455	22.9187	0.490713	0.559671
